# Supplementary material for: An expert consensus for the management of chronic hepatitis B in Asian Americans
Source: PubMed Central journal article supplement — Aliment Pharmacol Ther. 2018 Feb 26;47(8):1181–200. doi: 10.1111/apt.14577 (PMC5900913; doi:10.1111/apt.14577), 2018-02-26

# The Annual Rates of Disease Progression in Asian Patients with Hepatitis B\*

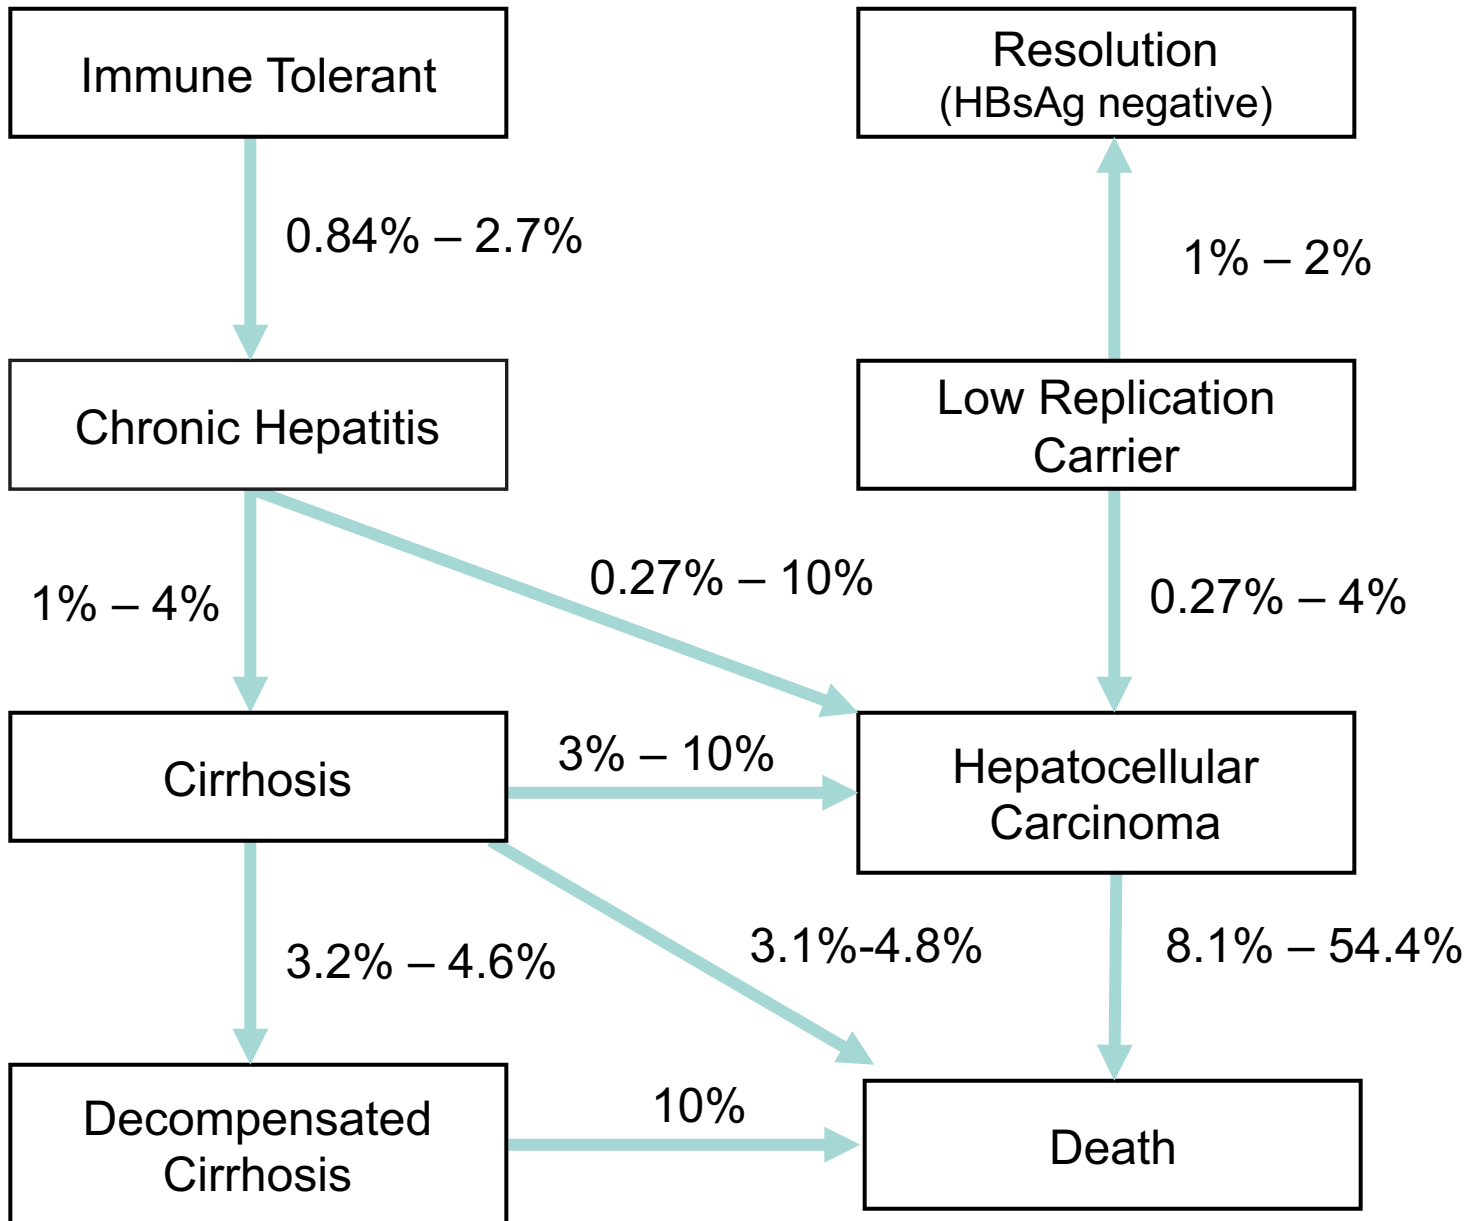

\*Annual rates derived from data on HBsAg positive Asian patients.

# Detection of HCC by Contrast MRI in Poor Quality Abdominal Ultrasound

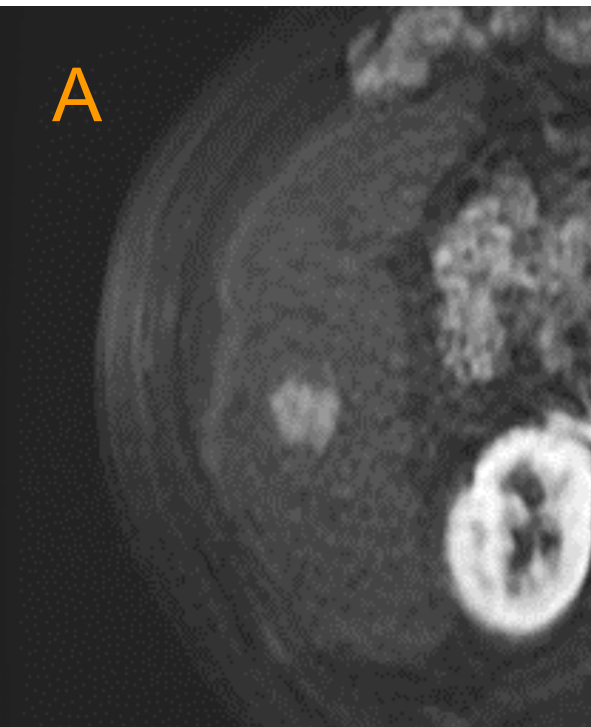

Contrast MRI

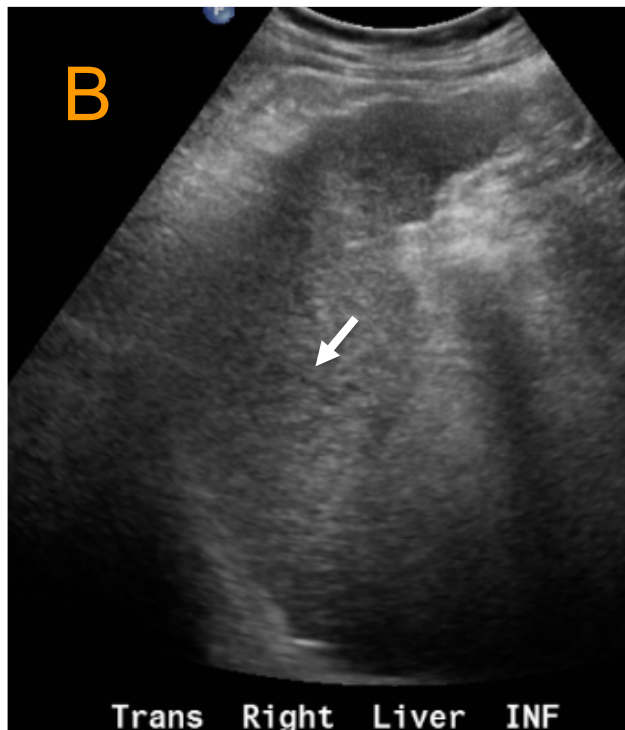

Abdominal Ultrasound

# Algorithm for Testing and Treatment for HBV Patients who Undergo Immunosuppressive Therapy

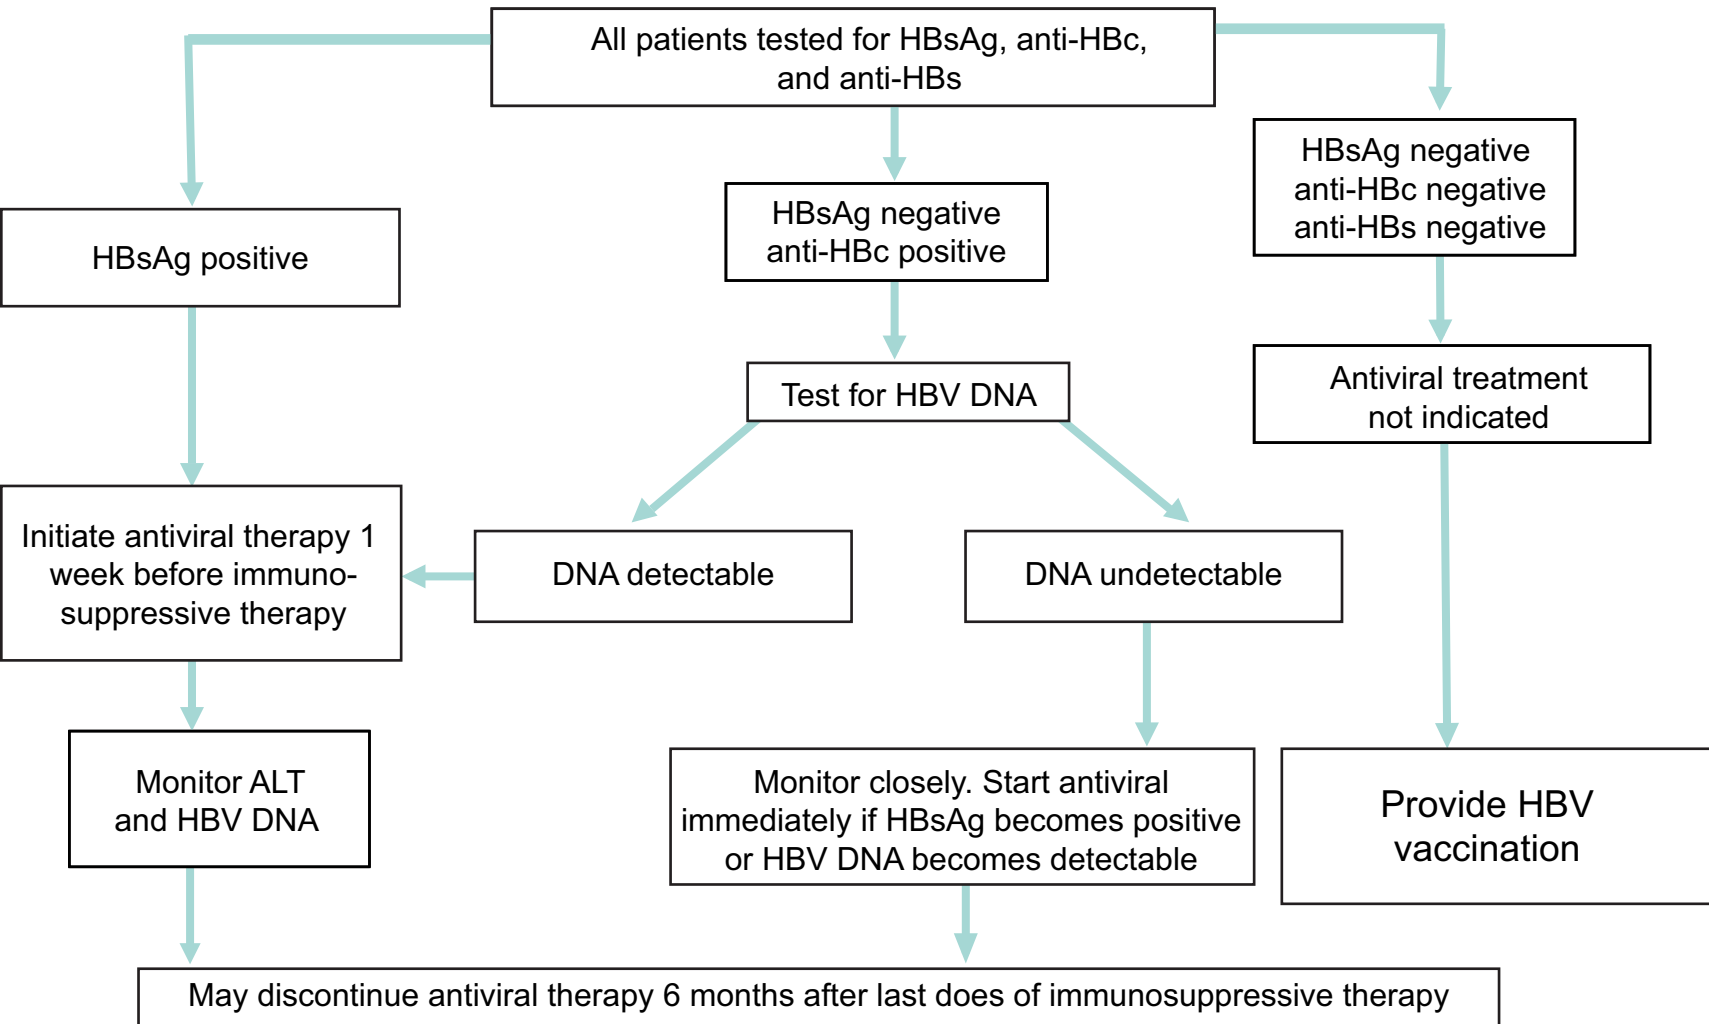

Supplement: APT-47-1181-s001.pdf [file APT-47-1181-s001.pdf]
