# Supplementary material for: An expert consensus for the management of chronic hepatitis B in Asian Americans
Source: PubMed Central journal article supplement — Aliment Pharmacol Ther. 2018 Feb 26;47(8):1181–200. doi: 10.1111/apt.14577 (PMC5900913; doi:10.1111/apt.14577), 2018-02-26
Supplement: APT-47-1181-s002.pdf [file APT-47-1181-s002.pdf]

# The Six Clinical Stages of CHB Infection

|                                               |                                                                                                                                                                                                                                                                                                                                 |
|-----------------------------------------------|---------------------------------------------------------------------------------------------------------------------------------------------------------------------------------------------------------------------------------------------------------------------------------------------------------------------------------|
| <u>HBeAg Positive</u>                         |                                                                                                                                                                                                                                                                                                                                 |
| Immune Tolerant                               | May present up to the third decade of life. Usually asymptomatic, normal ALT values, HBV DNA levels range from 2,000,000 to 200,000,000,000 iu/ml ( $10^7 - 10^{12}$ copies/ml). Liver biopsy or elastography findings of minimal or no fibrosis. <sup>a</sup> Little or no progression after 5 years follow-up. <sup>b,c</sup> |
| Chronic Hepatitis                             | May present with or without symptoms, elevated ALT values, HBV DNA 20,000 to 20,000,000 iu/ml ( $10^5 - 10^8$ copies/ml). Liver biopsy shows acute necroinflammation and moderate to advanced fibrosis.                                                                                                                         |
| Cirrhosis                                     | Usually present in fourth to fifth decade of life, elevated ALT values, HBV DNA 20,000 to 2,000,000 iu/ml ( $10^5 - 10^7$ copies/ml). May have decreased albumin levels and low platelet counts.                                                                                                                                |
| <u>HBeAg Negative</u>                         |                                                                                                                                                                                                                                                                                                                                 |
| Low Replication Stage (i.e. inactive carrier) | Normal ALT value, HBV DNA $\leq 2000$ iu/ml ( $\leq 10^4$ copies/ml). Prognosis good. However, reversion to active liver disease may occur.                                                                                                                                                                                     |
| Chronic Hepatitis                             | Characteristics similar to HBeAg positive chronic hepatitis patients.                                                                                                                                                                                                                                                           |
| Cirrhosis                                     | Characteristics similar to HBeAg positive cirrhosis patients.                                                                                                                                                                                                                                                                   |

\*Reversion to active liver disease may occur at any stage of HBV infection.

<sup>a</sup> Kao JH, Chen DS. Critical analysis of the immune tolerance phase of chronic HBV infection: Natural history and diagnoses. *Curr Hepatol Rep* 2008;7:5-11.

<sup>b</sup> Yim HJ, Lok AS. Natural history of chronic hepatitis B virus infection: what we knew in 1981 and what we know in 2005. *Hepatology* 2006; 43(2 Suppl 1):S173-S181.

<sup>c</sup> Hui CK, Leung N, Yuen ST, et al. Natural history and disease progression in Chinese chronic hepatitis B patients in immune-tolerant phase. *Hepatology* 2007;46:395-401.

# Predictions of Progression in CHB patients

|              |                                                                                                                                                                                                                                                                                                                                                                                                                          |
|--------------|--------------------------------------------------------------------------------------------------------------------------------------------------------------------------------------------------------------------------------------------------------------------------------------------------------------------------------------------------------------------------------------------------------------------------|
|              |                                                                                                                                                                                                                                                                                                                                                                                                                          |
| HBeAg        | Used as a surrogate marker for high levels of serum HBV DNA. HBeAg has been reported to be a risk factor for chronic hepatitis, cirrhosis, and HCC. <sup>a,b,c</sup>                                                                                                                                                                                                                                                     |
| HBV Genotype | Genotype C is predictive of non chemical outcomes and HCC development. <sup>d,e,f,g</sup> Genotype B is associated with HCC in younger Taiwanese patients and in older Japanese patients.                                                                                                                                                                                                                                |
| HBV-DNA      | A linear relationship between progression to cirrhosis and to development of HCC in Taiwanese <sup>h,i,j</sup> . The rate of progression to cirrhosis increased with increasing levels of HBV DNA starting from 2000 iu/ml (10 <sup>4</sup> copies/ml). Also the incidence of HCC increased from 1.3% for HBV DNA < 60 iu/ml (< 300 copies/ml) to 14.9% for HBV DNA levels ≥ 200,000 iu/ml (≥ 10 <sup>6</sup> copies/ml) |
| BCP Mutants  | BCP mutants were detected more frequently in HCC patients with high HBV DNA levels and Genotype C. <sup>e,g,k</sup> The BCP mutants was associated with an increased risk for disease progression and development of HCC in both genotypes B and C patients. <sup>e,f</sup>                                                                                                                                              |
| PC Mutants   | PC Mutants are most often detected in HBeAg negative CHB patients. <sup>c,d,e,f,g,i,k,l,m</sup> PC mutants are associated with ALT elevations, increased HBV DNA levels, and persistent hepatic necroinflammation.                                                                                                                                                                                                       |
| AFP          | Elevated AFP levels during ALT flares, in the absence of HCC, were detected in CHB patients who progressed to cirrhosis and may be used as a marker for antiviral therapy.                                                                                                                                                                                                                                               |

HBeAg: Hepatitis B “e” antigen

HBV: Hepatitis B virus

HBV DNA: Hepatitis B virus deoxyribonucleic acid

BCP: Basal core promoter

PC: Precore

AFP: Alpha-fetoprotein

<sup>a</sup> Lin CL, Liao LY, Liu CJ, et al. Hepatitis B viral factors in HBeAg negative carriers with persistently normal serum alanine aminotransferase levels. *Hepatology* 2007;45:1193-1198.

<sup>b</sup> Yang HI, Lu SN, Liaw YF, et al. Hepatitis B e antigen and the risk of hepatocellular carcinoma. *N Engl J Med* 2002;347:168-174.

<sup>c</sup> Chen CJ, Yang HI. Natural history of chronic hepatitis B REVEALed. *J Gastroenterol Hepatol* 2011;26:628-638.

<sup>d</sup> Chan HL, Hui AY, Wong ML, et al. Genotype C hepatitis B virus infection is associated with an increased risk of hepatocellular carcinoma. *Gut* 2004;53:1494-1498.

<sup>e</sup> Liu CJ, Chen BF, Chen PJ, et al. Role of hepatitis B viral load and basal core promoter mutation in hepatocellular carcinoma in hepatitis B carriers. *J Infect Dis* 2006;193:1258-1265.

<sup>f</sup> Kao JH, Chen PJ, Lai MY, Chen DS. Basal core promoter mutations of hepatitis B virus increase the risk of hepatocellular carcinoma in hepatitis B carriers. *Gastroenterology* 2003;124:327-334.

<sup>g</sup> Tong MJ, Blatt LM, Kao JH, Cheng JT, Corey WG. Basal core promoter T1762/A1764 and precore A1896 gene mutations in hepatitis B surface antigen-positive hepatocellular carcinoma: a comparison with chronic carriers. *Liver Int* 2007;27:1356-1363.

<sup>h</sup> Chen CJ, Yang HI. Natural history of chronic hepatitis B REVEALed. *J Gastroenterol Hepatol* 2011;26:628-638.

<sup>i</sup> McMahon BJ. The natural history of chronic hepatitis B virus infection. *Hepatology* 2009;49:S45-S55.

<sup>j</sup> Liew Y, Tai D, Chen T, et al. Alpha-fetoprotein changes in the course of chronic hepatitis: relation to bridging hepatic necrosis and hepatocellular carcinoma. *Liver* 1986;6:133-137.

<sup>k</sup> Loomba R, Liu J, Yang HI, et al. Synergistic effects of family history of hepatocellular carcinoma and hepatitis B virus infection on risk for incident hepatocellular carcinoma. *Clin Gastroenterol Hepatol* 2013;11:1636-1645.e1-3. doi: 10.1016/j.cgh.2013.04.043.

<sup>l</sup> Tong MJ, Huynh TT, Siripongsakun S, et al. Predicting clinical outcomes in patients with HBsAg-positive chronic hepatitis. *Hepatol Int* 2015;9:567-577.

<sup>m</sup> Beasley RP, Hwang LY, Lin CC, Chien CS. Hepatocellular carcinoma and hepatitis B virus. A prospective study of 22 707 men in Taiwan. *Lancet* 1981;2:1129-1133.

# Treatments for Hepatocellular Carcinoma

## 1) Surgery

- a) Resection
- b) Liver Transplantation

## 2) Interventional Radiology

### a) Percutaneous Ablative Techniques

- 1) Ethanol
- 2) Radiofrequency
- 3) Microwave
- 4) Irreversible electroporation

### b) Transcatheter Techniques

- 1) Chemoembolization
- 2) Drug eluting beads
- 3) Yttrium – 90

## 3) Oncology

- a) Chemotherapy
- b) Immunotherapy

# Summary of Published Guidelines and Algorithms for Treatment for HBV Infection

|                       | HBeAg Positive |          |             | HBeAg Negative |          |             | Compensated Cirrhosis |     | Decompensated Cirrhosis |     |
|-----------------------|----------------|----------|-------------|----------------|----------|-------------|-----------------------|-----|-------------------------|-----|
|                       | HBV DNA        | ALT      | Histology   | HBV DNA        | ALT      | Histology   | HBV DNA               | ALT | HBV DNA                 | ALT |
| EASL Guidelines 2017  | >2,000 IU/mL   | > ULN    | Mod G/Mod F | >2,000 IU/mL   | > ULN    | Mod G/Mod F | Detectable            | NA  | Detectable              | NA  |
|                       | >2,000 IU/mL   | < ULN    | Mod G/Mod F | >2,000 IU/mL   | < ULN    | Mod G/Mod F |                       |     |                         |     |
| APASL Guidelines 2012 | >20,000 IU/mL  | > 2x ULN | NA          | >2,000 IU/mL   | > 2x ULN | NA          | >2,000 IU/mL          | NA  | NA                      | NA  |
| AASLD Guidelines 2015 | >20,000 IU/mL  | > 2x ULN | NA          | >2,000 IU/mL   | > 2x ULN | NA          | Detectable            | NA  | NA                      | NA  |
| US Algorithm 2015     | >2,000 IU/mL   | > ULN    | NA          | >2,000 IU/mL   | > ULN    | NA          | Detectable            | NA  | Detectable              | NA  |

ULN: Upper limits of normal

NA: Not applicable

Mod G: Moderate grade of inflammation

Mod F: Moderate fibrosis

# Type and Definition of Responses to Treatment for HBV Infection

| Types                  | Alternative Terms               | Definition                                                                                                                                      |
|------------------------|---------------------------------|-------------------------------------------------------------------------------------------------------------------------------------------------|
| Virological Response   |                                 | Undetectable HBV DNA by a sensitive PCR (20 IU/mL)                                                                                              |
| Primary Non-Response   |                                 | < 1 log HBV DNA (IU/mL) decline from baseline at 3 months of treatment                                                                          |
| Partial Response       | Sub-Optimal Response            | > 1 log decline, but detectable HBV DNA (IU/mL) after at 3 months of treatment                                                                  |
| Secondary Non-Response | Virological Breakthrough        | > 1 log increase from the nadir HBV DNA(IU/mL) level while on therapy in compliant patients                                                     |
| HBV Resistance         | Anti-HBV Virological Resistance | Development of selected HBV variants with ammino acid substitution and reduced susceptibility to the same NA therapy                            |
| Virological Rebound    | Relapse                         | Increase in serum HBV DNA to >20,000 IU/mL or above pre-treatment baseline level after achieving virological response, during continued therapy |
